# Supplementary material for: Poly(vinyl benzyl methylpyrrolidinium) hydroxide derived anion exchange membranes for water electrolysis
Source: Royal Society of Chemistry journal article supplement (doi:10.1039/c9ta04868e), 2019-01-01
Supplement: c9ta04868e1.pdf [file c9ta04868e1.pdf]

## Supporting Information

### Poly(vinyl benzyl methylpyrrolidinium) hydroxide derived anion exchange membranes for water electrolysis

Huanhuan Li<sup>a</sup>, Mikkel Rykær Kraglund<sup>b</sup>, Alexander Kappel Reumert<sup>b</sup>, Xiaorui Ren<sup>a</sup>, David Aili<sup>b,\*</sup>, Jingshuai Yang<sup>a,\*</sup>

<sup>a</sup>Department of Chemistry, College of Sciences, Northeastern University, Shenyang 110819, China, \*Corresponding author (E-mail: yjs@mail.neu.edu.cn)

<sup>b</sup>Department of Energy Conversion and Storage, Technical University of Denmark, Elektrovej, Building 375, 2800 Lyngby, Denmark, \*Corresponding author (E-mail: larda@dtu.dk)

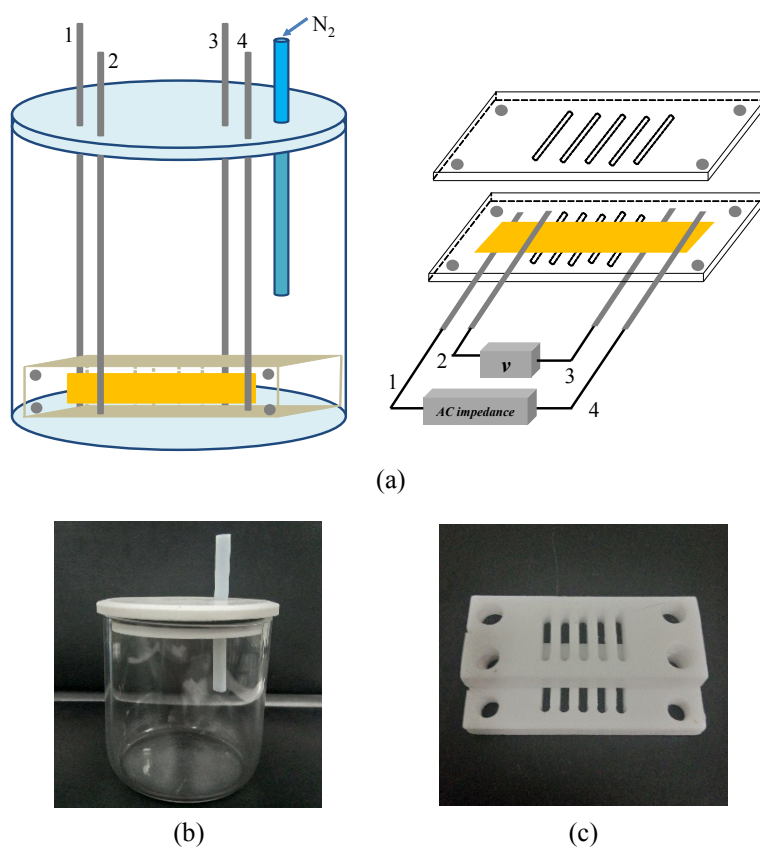

Figure S1 Schematic drawings (a) and photos (b, c) of the conductivity measurement cell.

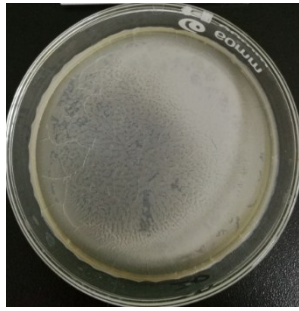

PVBC-MPy/15%PES

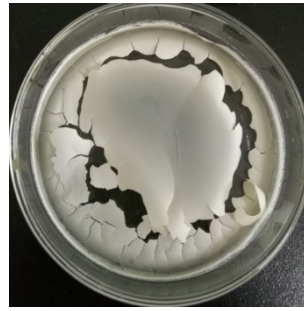

PVBC-MPy/15%PSF

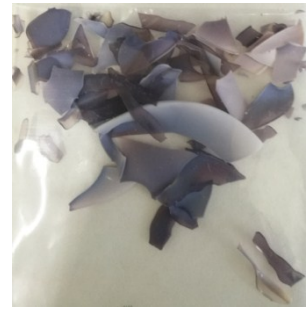

PVBC-MPy/15%PVC

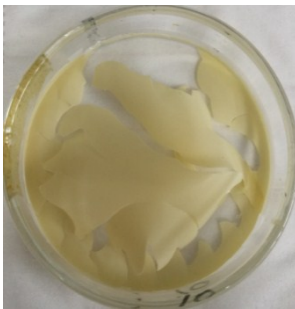

PVBC-MPy/15%PVDF

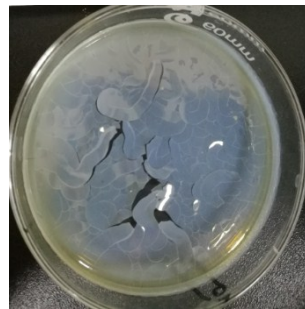

PVBC-MPy/15%PAEK

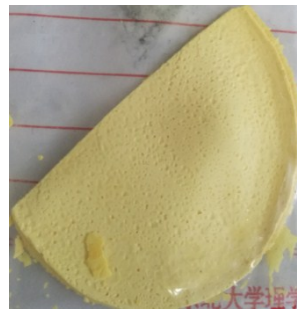

PVBC-MPy/15%PBI

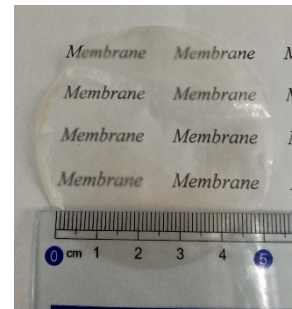

PVBC-MPy/15%PEK-cardo

Figure S2 Photographs of various blend PVBC-MPy membranes with different enhanced polymers, including polyethersulfone (PES), polysulfone (PSF), polyvinyl chloride (PVC), polyvinylidene fluoride (PVDF), polyaryletherketone (PAEK), polybenzimidazole (PBI) and poly(ether ketone-cardo) (PEK-cardo)

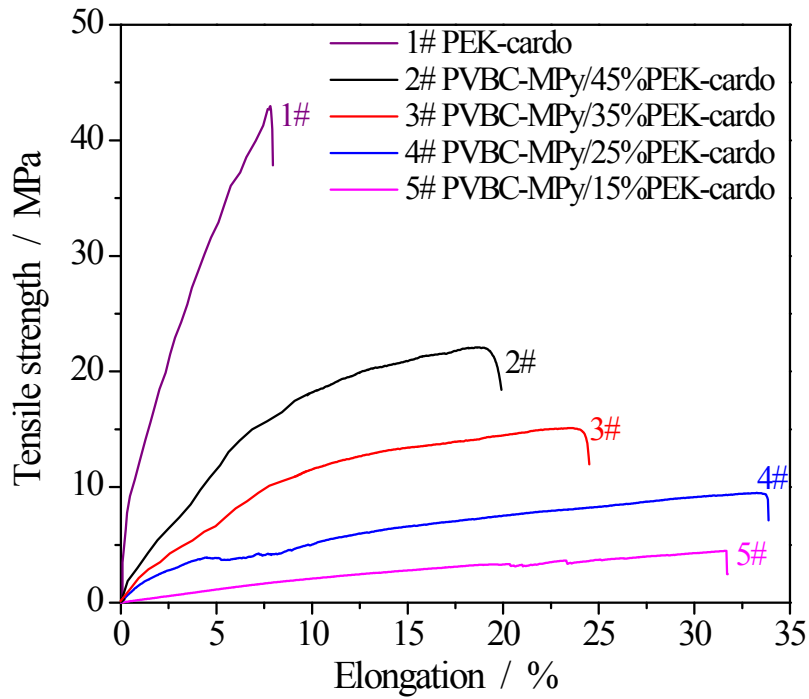

Figure S3 Representative stress-strain curves of hydrated PVBC-MPy/x%PEK-cardo membranes (in OH<sup>-</sup> form) at RT.

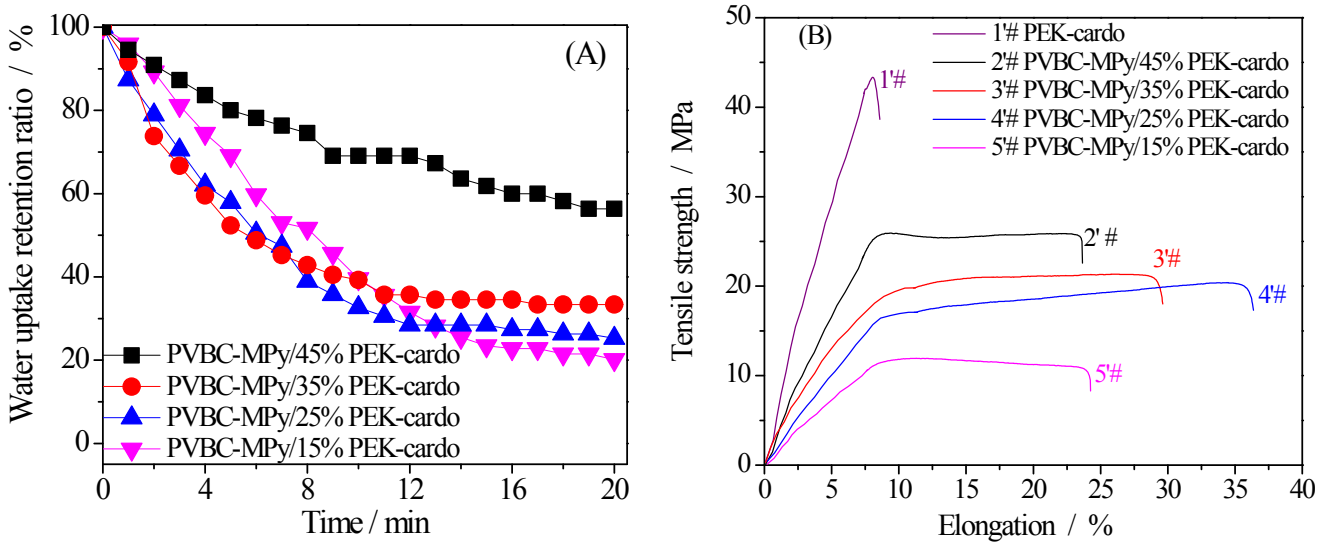

Figure S4 Water uptake retention ratio of PVBC-MPy/x%PEK-cardo membranes as a function of time under ambient atmosphere (A); Stress-strain curves recorded after 20 min under air atmosphere (B). The water uptake retention ratio of the membrane refers to the water uptake at each test point relative to the initial water uptake.

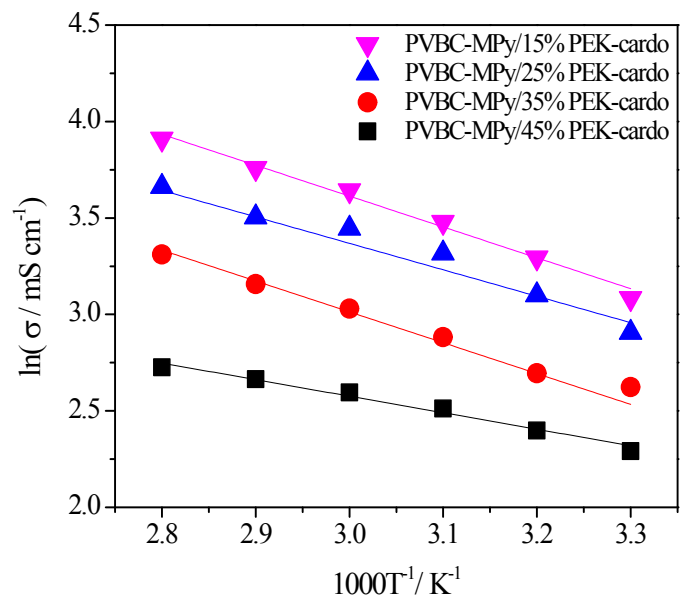

Figure S5 Arrhenius plots of PVBC-MPy/x%PEK-cardo membranes.

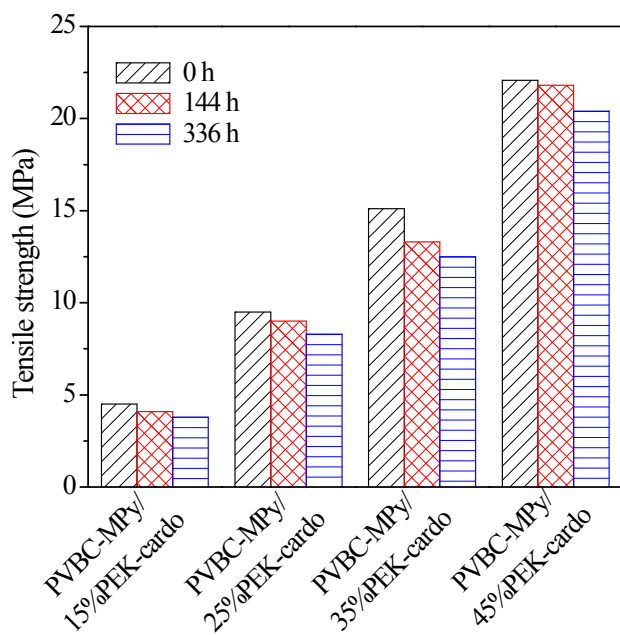

Figure S6 Mechanical strength of the PVBC-MPy/x%PEK-cardo membranes after aging 1 mol L<sup>-1</sup> aqueous KOH at 60 °C at different time

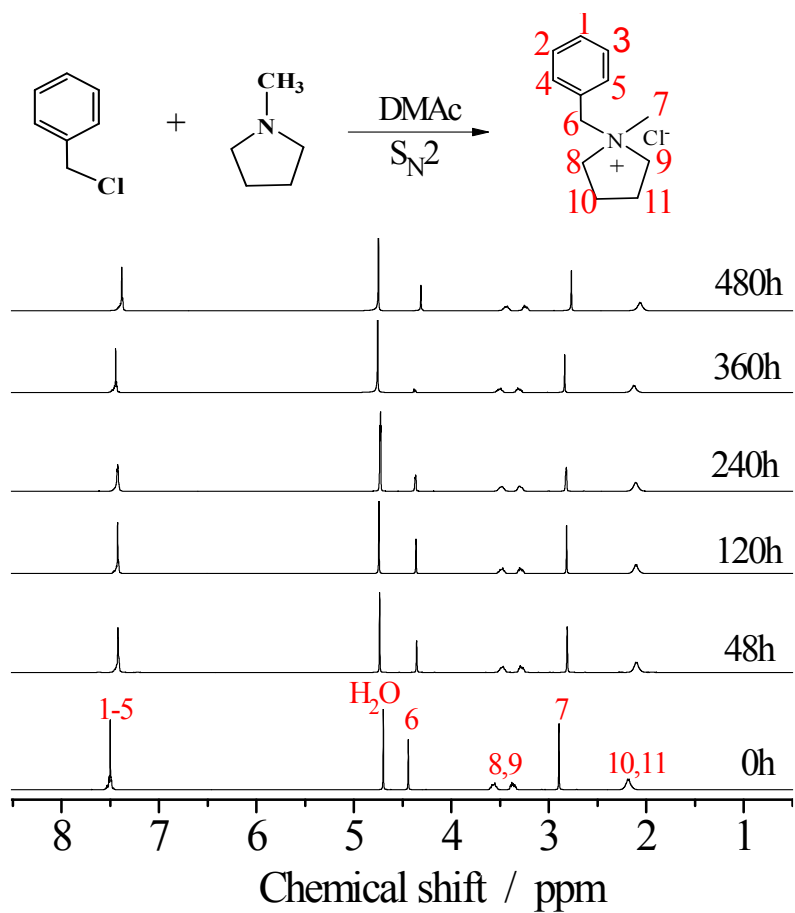

Figure S7 The <sup>1</sup>H NMR spectra of the model compound (1-benzyl-1-methylpyrrolidinium chloride) after alkaline treatment in 1 M NaOD/D<sub>2</sub>O solution at 60 °C.

Table S1 Comparison of properties of membranes in the present work and literature

| Membranes             | IEC <sup>a</sup>     | IEC <sup>b</sup> | Volume swelling<br>% | Conductivity retention rate<br>% @60°C 1M KOH | Tensile strength<br>MPa | Ref.      |
|-----------------------|----------------------|------------------|----------------------|-----------------------------------------------|-------------------------|-----------|
|                       | mmol g <sup>-1</sup> |                  |                      |                                               |                         |           |
| PVBC-MPy/15%PEK-cardo | 3.60                 | 3.47±0.2         | 110±3.2              | 84.8 @432h                                    | 4.5                     | This work |
| PVBC-MPy/25%PEK-cardo | 3.18                 | 3.10±0.2         | 61±5.1               | 94.9 @432h                                    | 9.5                     | This work |
| PVBC-MPy/35%PEK-cardo | 2.75                 | 2.65±0.2         | 38±2.6               | 91.3 @432h                                    | 15.1                    | This work |
| PVBC-MPy/45%PEK-cardo | 2.33                 | 2.34±0.3         | 26±1.6               | 93.3 @432h                                    | 22.1                    | This work |
| PPO-MPy               | 2.3                  | 1.8 ± 0.2        | 89.1±8.6             | 98.4 @216h                                    | 8.3                     | 1         |
| PPO-MPrD              | 2.2                  | 1.7 ± 0.2        | 87.4±5.1             | 93.4 @216h                                    | 9.5                     | 1         |
| ImPPO-1#              | 1.38                 | 0.95±0.05        | 41.3±7.0             | 12.5 @40h                                     | 21.1±2.3                | 2         |
| ImPPO-4#              | 1.21                 | 1.03±0.06        | 45.5±5.4             | ~92 @180h                                     | 14.6±1.0                | 2         |
| PVAc(1)-c-PVBC(1)/OH  | -                    | 1.26             | 26.3                 | ~66.7%@210h@40°C                              | 14.2                    | 3         |
| BPPO-MMPH             | 2.16                 | 1.68±0.01        | -                    | ~42 @360h                                     | 26.21                   | 4         |
| BPPO-MPY              | 2.24                 | 1.74±0.02        | -                    | ~85 @360h                                     | 26                      | 4         |
| [PEMPy][OH]           | 1.49                 | 1.41±0.08        | 24.23±3.67           | ~97%@432h @80°C                               | 7.52 ± 1.14             | 5         |
| [PBenMPy][OH]         | -                    | 1.47±0.051       | -                    | ~80 @240h @80°C                               | 7.83±1.23               | 5         |
| 65PAEK-BIm/SPEEK15    | 2.58                 | 2.28 ± 0.15      | 89±5                 | ~75 @200h                                     | 15.1 ± 1.5              | 6         |

PPO-MPy: 1-Methylpyrrolidine functionalized poly(phenylene oxide) (PPO);

PPO-MPrD: 1-Methylpiperidinium grafted PPO;

ImPPO-1#: 1-Methylimidazole functionalized PPO;

ImPPO-4#: 1-butyl-2-methylimidazolium functionalized PPO;

PVAc(1)-c-PVBC(1)/OH: Poly(vinyl acetal) containing dimethylamino crosslinked poly(vinyl benzyl chloride);

BPPO-MMPH: 4-Methylmorpholine based PPO;

[PEMPy][OH]: N,N-Ethylmethyl-substituted pyrrolidinium cation containing copolymers ;

[PBenMPy][OH]: 1-benzyl-1-methylpyrrolidinium containing copolymers;

65PAEK-BIm/SPEEK<sub>15</sub>: Ionically crosslinked imidazolium functionalized poly(ether ether ketone).

#### References:

1. Y. Yang, Y. Xu, N. Ye, D. Zhang, J. Yang and R. He, *J. Electrochem. Soc.*, 2018, **165**, F350-F356.
2. J. Yang, C. Liu, Y. Hao, X. He and R. He, *Electrochim. Acta*, 2016, **207**, 112-119.
3. W. Lu, Z. G. Shao, G. Zhang, Y. Zhao and B. Yi, *J. Power Sources*, 2014, **248**, 905-914.
4. Y. Jiang, J. Liao, S. Yang, J. Li, Y. Xu, H. Ruan, A. Sotito, B. Van der Bruggen and J. Shen, *Reac. Funct. Polym.*, 2018, **130**, 61-69.
5. F. Gu, H. Dong, Y. Li, Z. Sun and F. Yan, *Macromolecules*, 2014, **47**, 6740-6747.
6. Y. Xu, N. Ye, D. Zhang, J. Yang and R. He, *J. Colloid Interface Sci.*, 2017, **497**, 333-342.
